# Supplementary material
Source: publisher figshare collection journal article supplement (https://karger.figshare.com/ndownloader/files/13816064)
Supplement: Supplementary file 1 [file 13816064]

**Supplementary Table 2**. Clinical-demographic characteristics of the sample included in primary (a), secondary (b) analysis. For each continuous and categorical variables mean ± standard deviation and distributions (percentage) were reported, respectively. BD=Bipolar disorder, eGFR=glomerular filtration rate according to Levey formula, NA=not available, SCZ=schizophrenia.

(a)

| **Variable** | **Primary Analysis** (n=77) |
| --- | --- |
| Age | 49.36 ± 15.49 |
| Gender N (%) | 35 M (45.45%), 42 F (54.55%) |
| Ethnicity caucasian/other | 77/0 |
| Diagnosis | 31 BD, 46 SCZ |
| Absolute QTc value | 381.95 ± 41.58 (0 NA) |
| QTc ≥ median (380 ms) yes/no | 42/35 (0 NA) |
| eGFR | 93.01 ± 16.70 (6 NA) |

(b)

| **Variable** | **Secondary Analysis** (n=25) |
| --- | --- |
| Age | 49.48 ± 14.68 |
| Gender N (%) | 13 M (52.00%), 12 F (48.00%) |
| Ethnicity caucasian/other | 25/0 |
| Diagnosis | 13 BD, 12 SCZ |
| QTc percentage change | 0.35 ± 11.09 (0 NA) |
| Baseline QTc | 392.64 ± 47.97 (0 NA) |
